# Supplementary material for: The in vitro host cell immune response to bovine-adapted Staphylococcus aureus varies according to bacterial lineage
Source: PubMed Central journal article supplement (PMC6467978; doi:10.1038/s41598-019-42424-2), 2019-04-16
Supplement: 41598_2019_42424_MOESM1_ESM.pdf [file 41598_2019_42424_MOESM1_ESM.pdf]

## Supplementary Information

**The *in vitro* host cell immune response to bovine-adapted *Staphylococcus aureus* varies according to bacterial lineage**

Mark P. Murphy<sup>a\*</sup>, Dagmara A. Niedziela<sup>a,b</sup>, Finola C. Leonard<sup>b</sup>, Orla M. Keane<sup>a</sup>

<sup>a</sup> Animal & Bioscience Department, Teagasc, Grange, Dunsany, Co. Meath, Ireland

<sup>b</sup> School of Veterinary Medicine, University College Dublin, Belfield, Ireland

This file includes Supplementary Information: Gene and protein expression in MAC-T and primary bovine mammary epithelial cells in response to infection with 12 strains of *S. aureus* belonging to bovine-adapted lineages CC71, CC97, ST136 and CC151 and significant differences between strains.

# MAC-T

## CC71

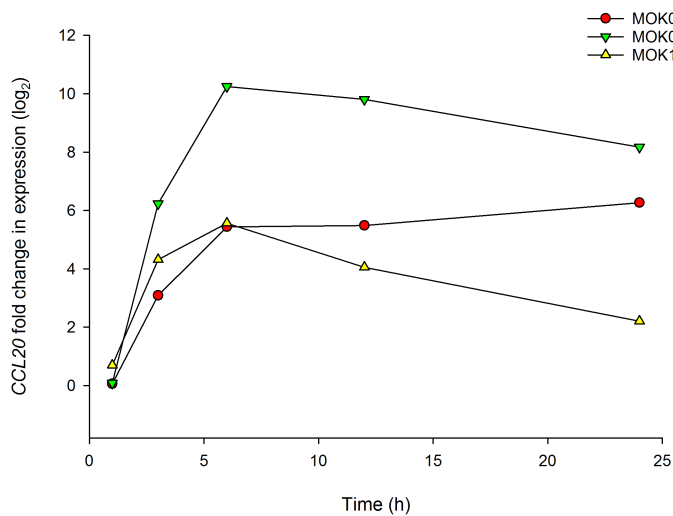

## CC97

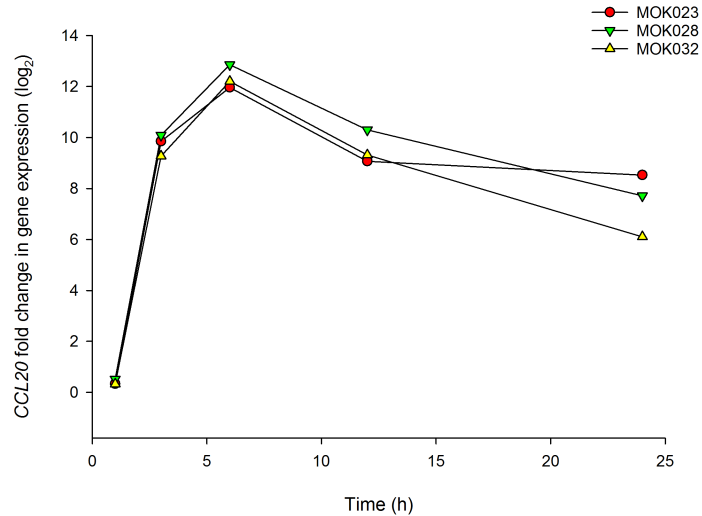

## ST136

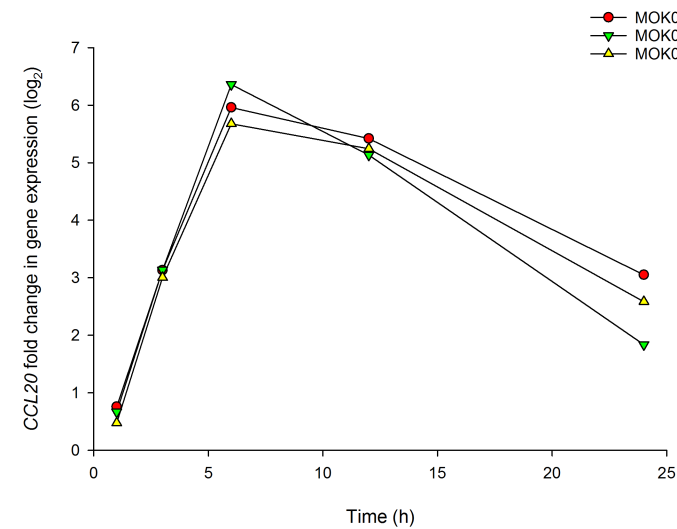

## CC151

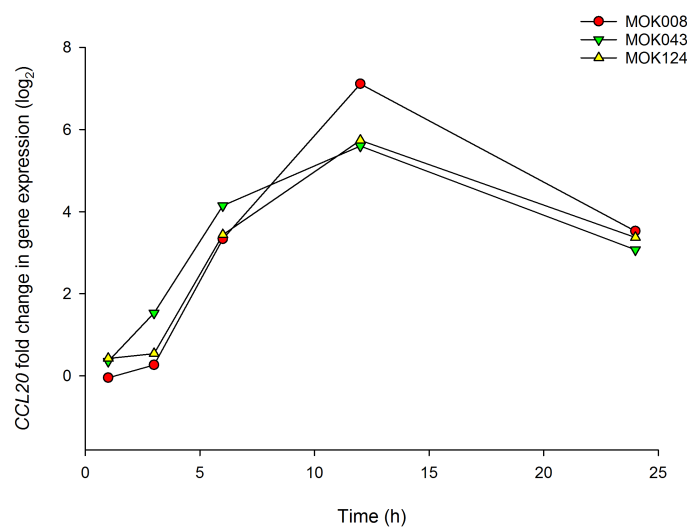

# MAC-T

## CC71

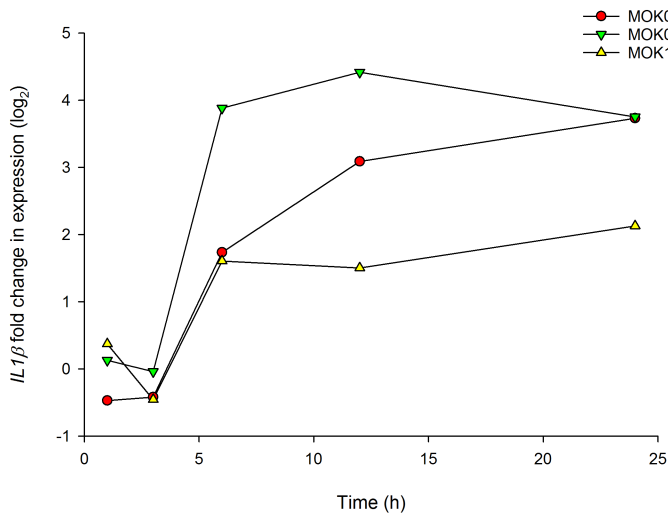

## CC97

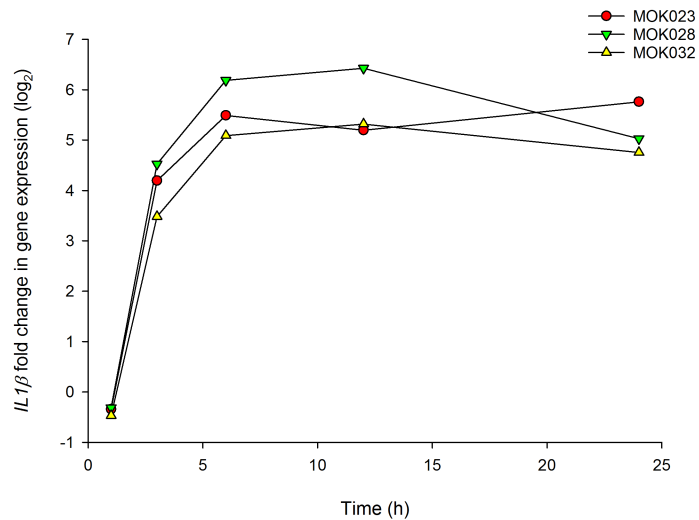

## ST136

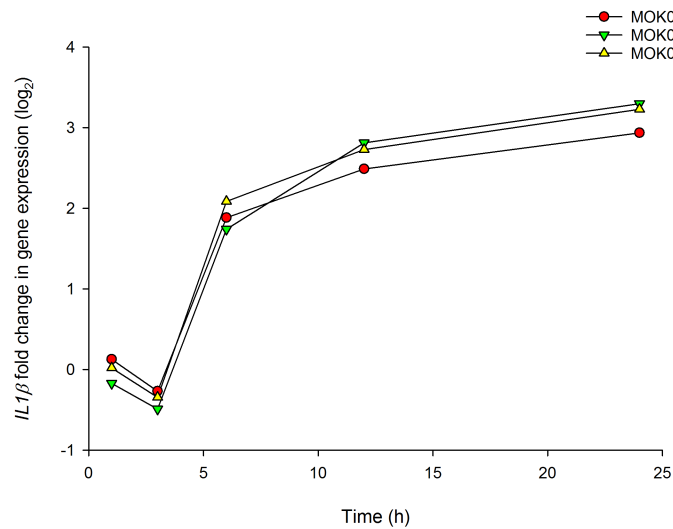

## CC151

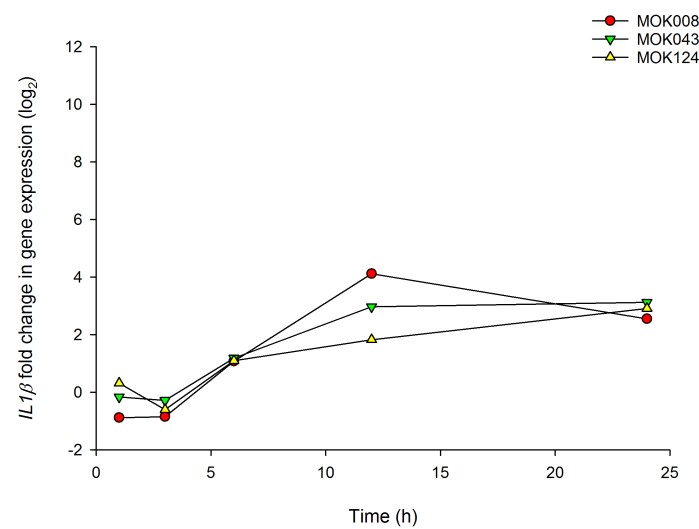

# MAC-T

## CC71

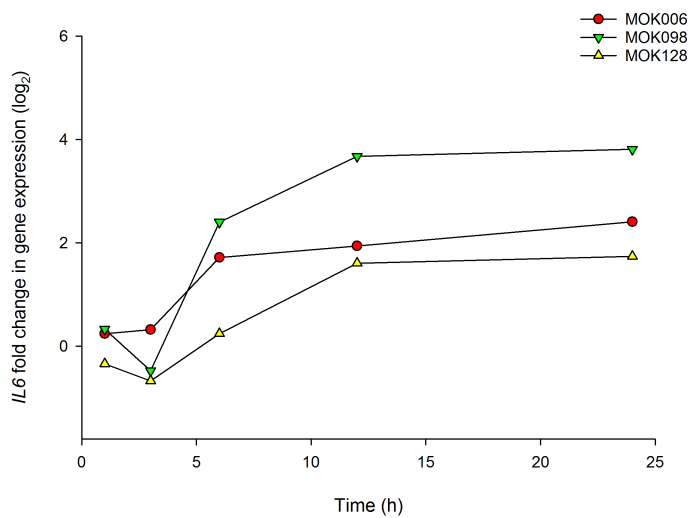

## CC97

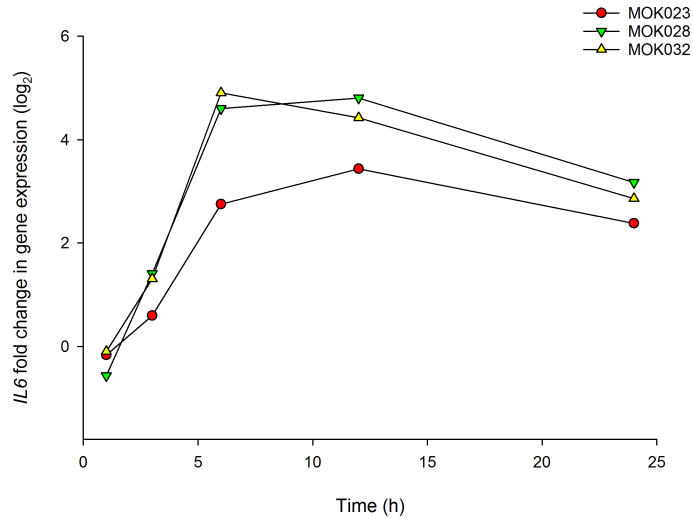

## ST136

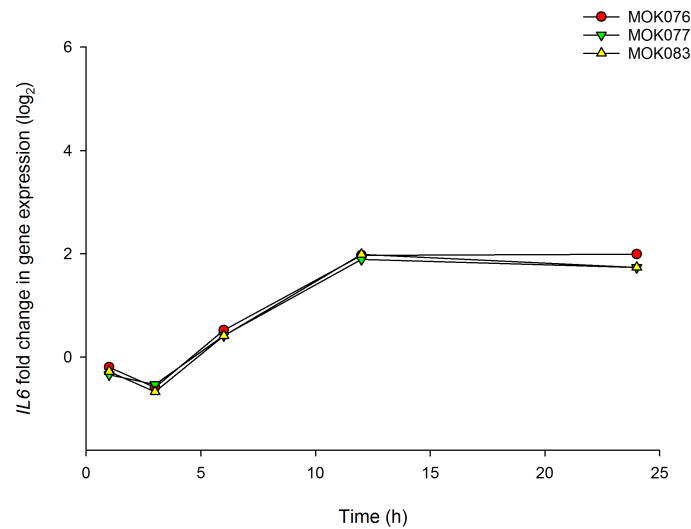

## CC151

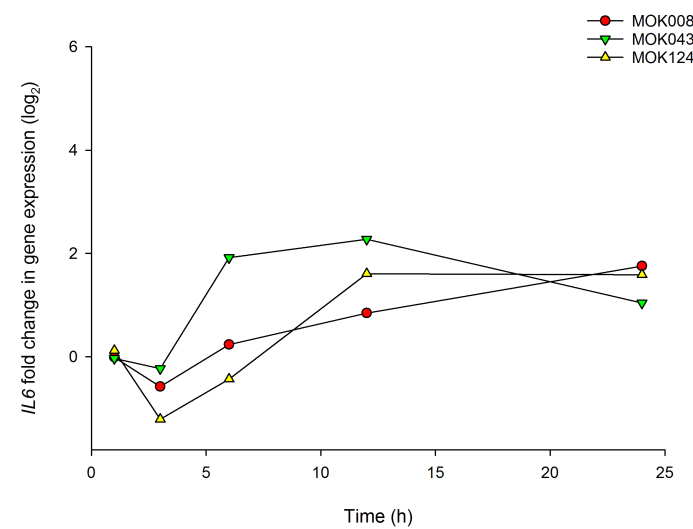

# MAC-T

## CC71

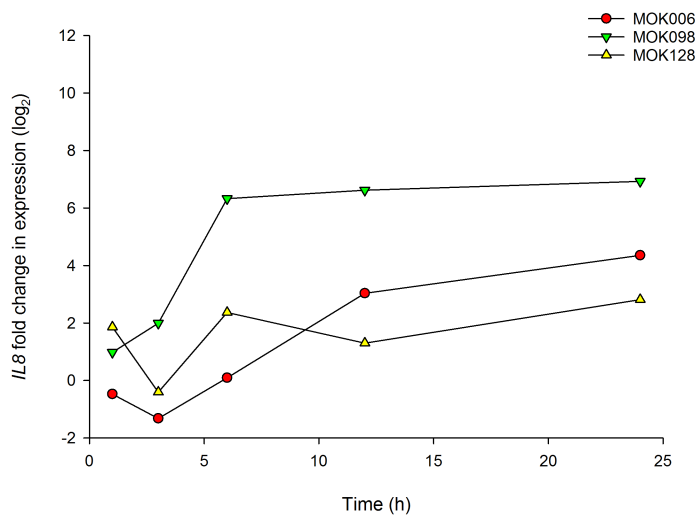

## CC97

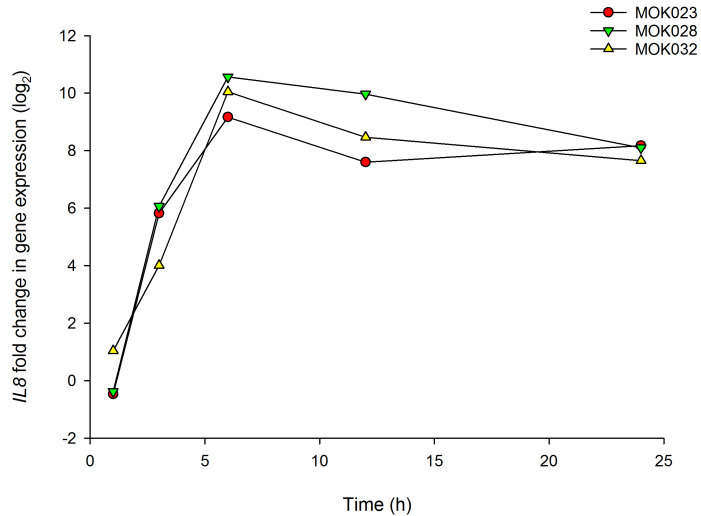

## ST136

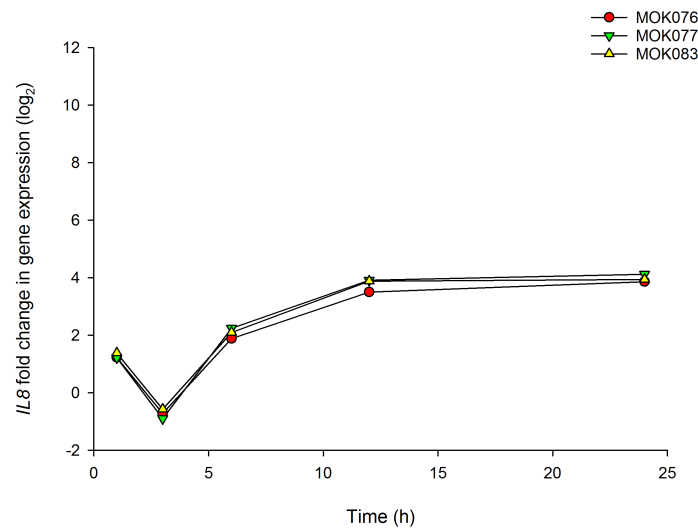

## CC151

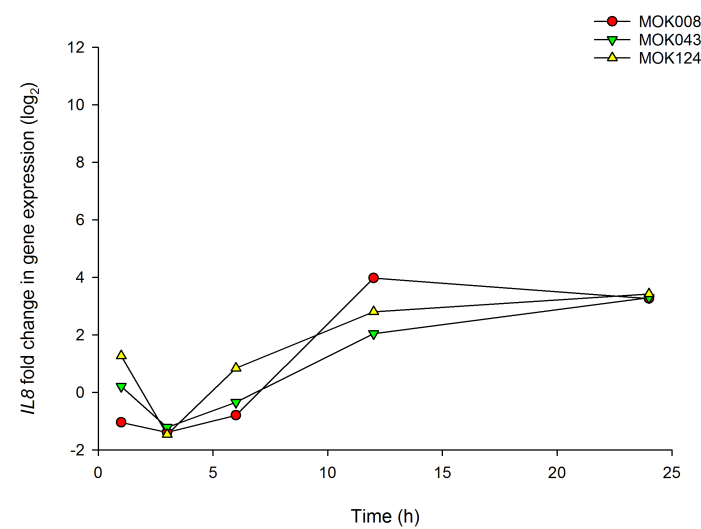

# MAC-T

## CC71

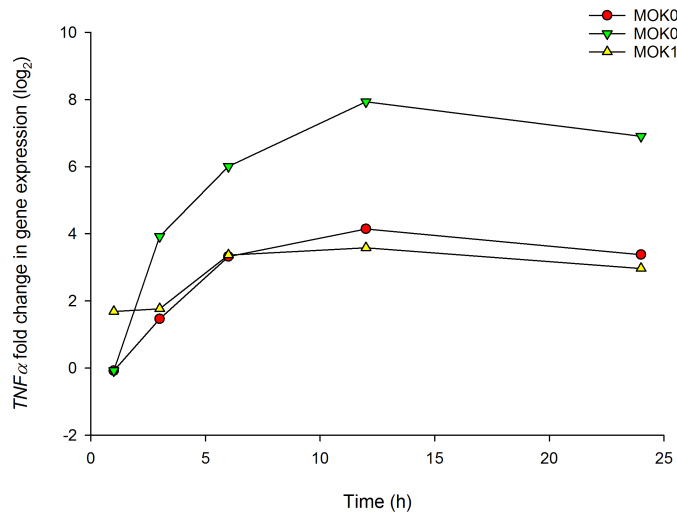

## CC97

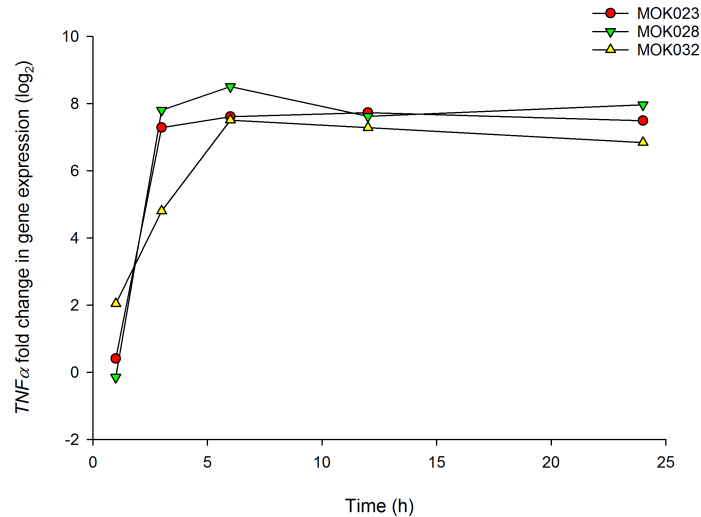

## ST136

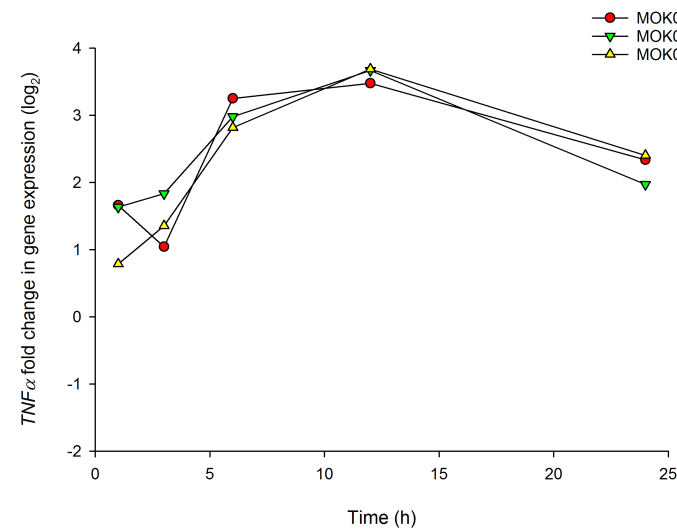

## CC151

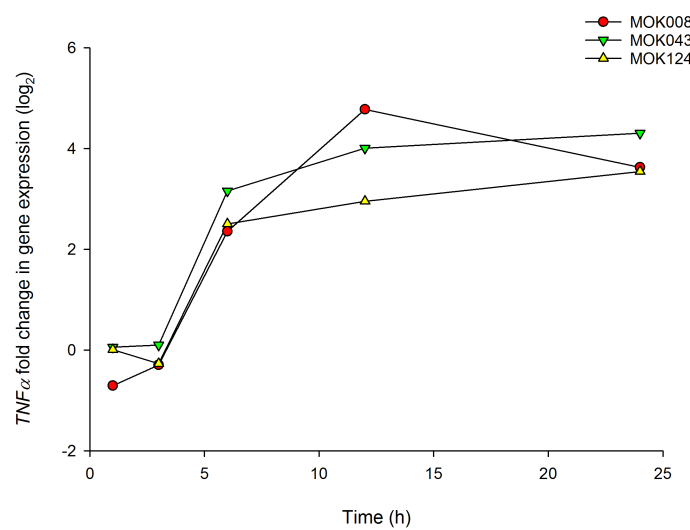

# MAC-T

## CC71

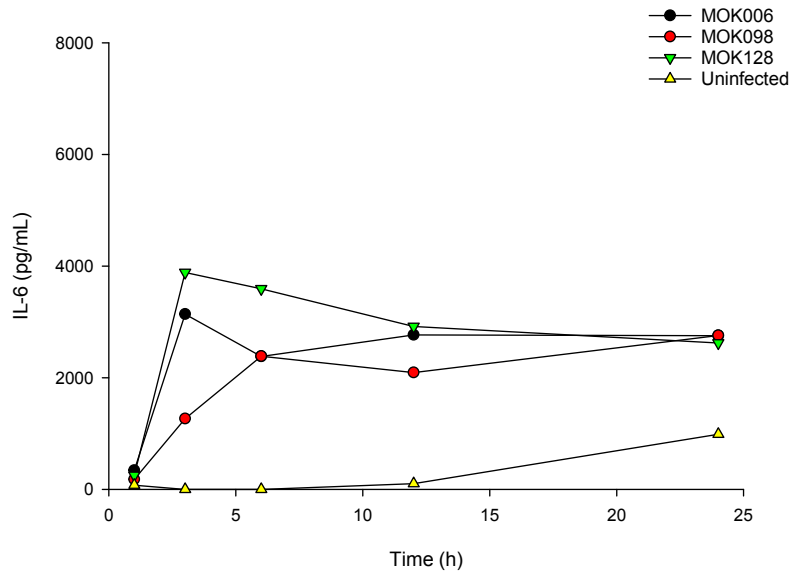

## CC97

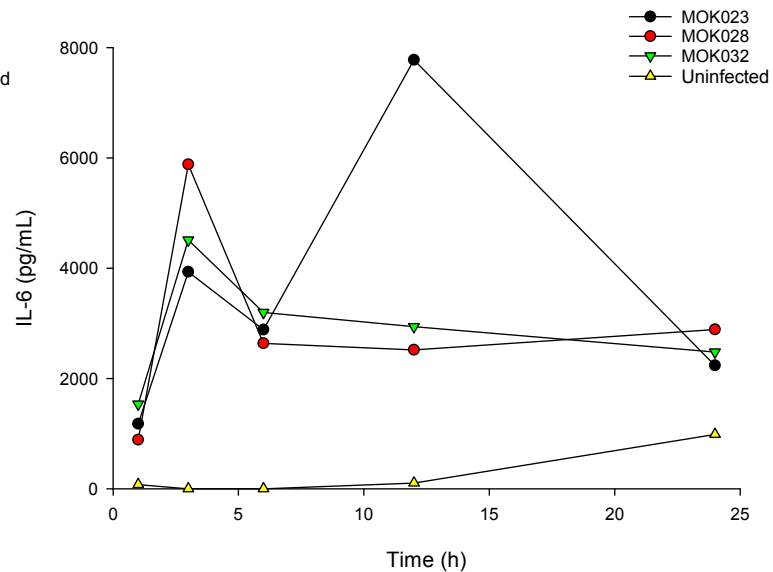

## CC151

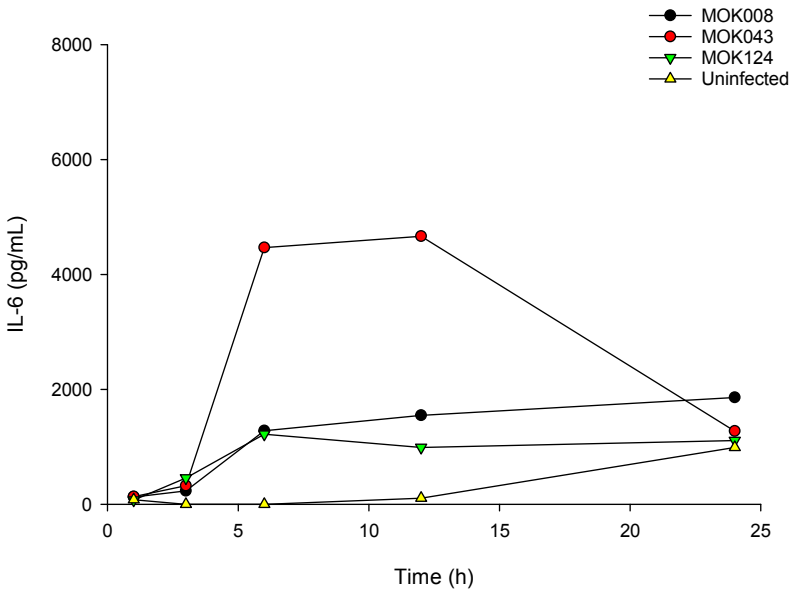

## ST136

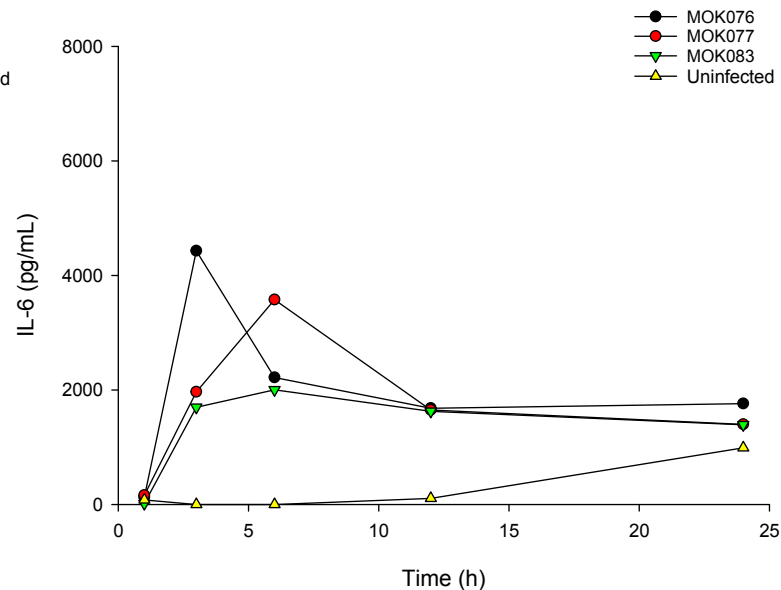

# MAC-T

## CC71

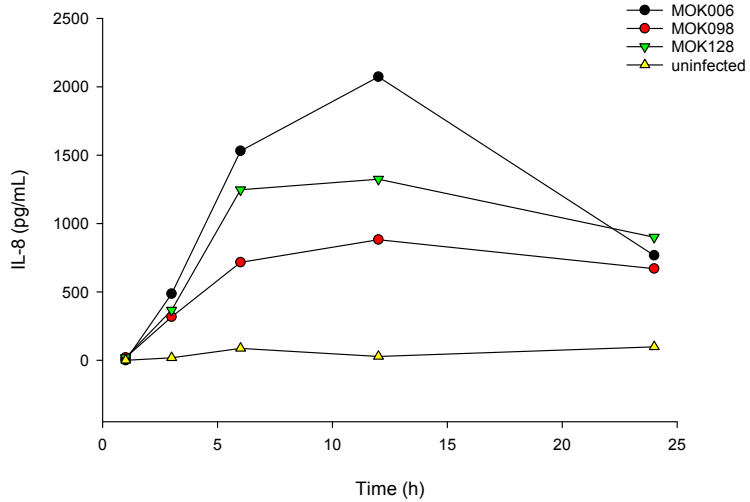

## CC97

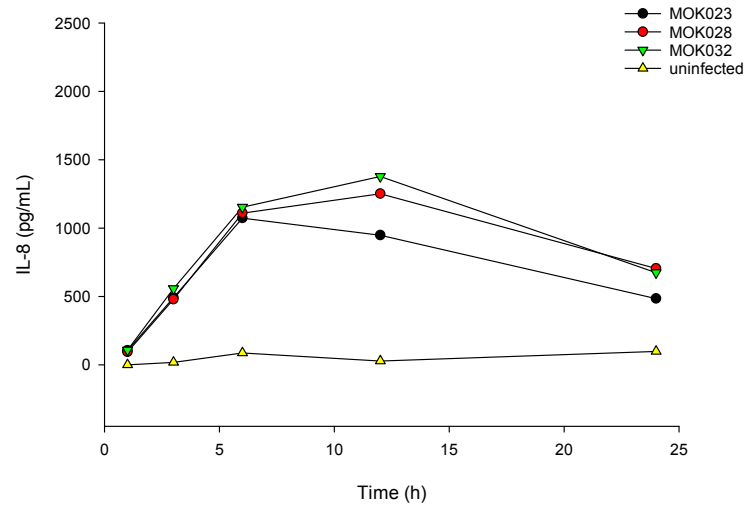

## ST136

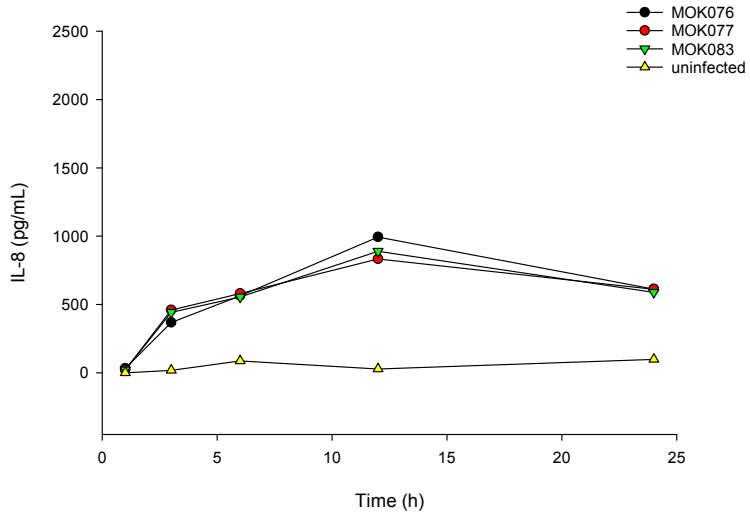

## CC151

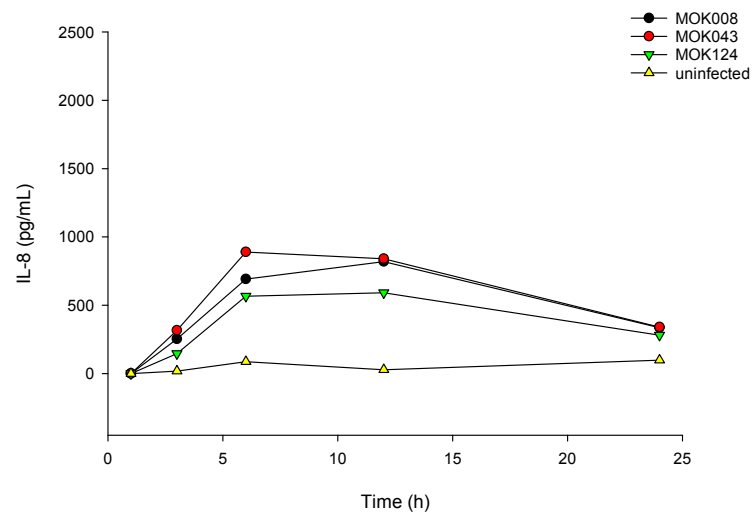



# pbMEC

## CC71

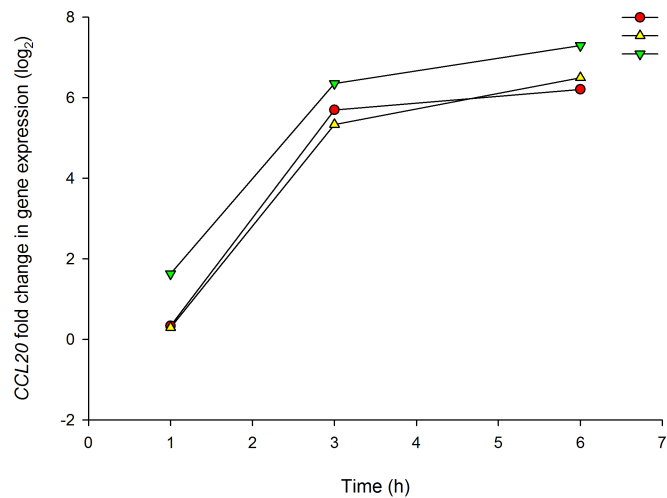

## CC97

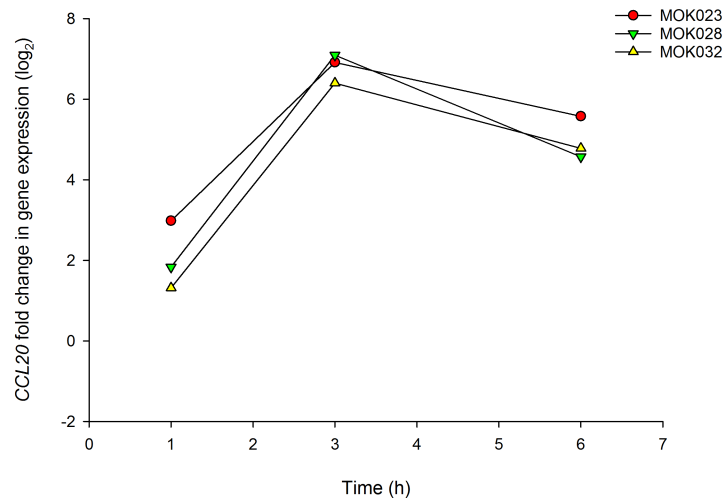

## ST136

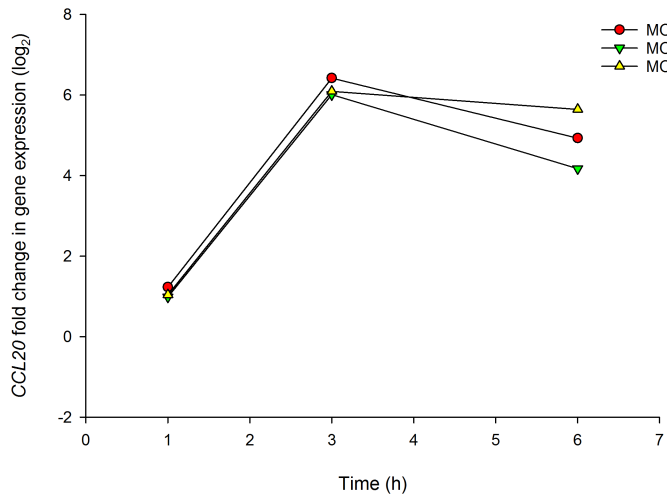

## CC151

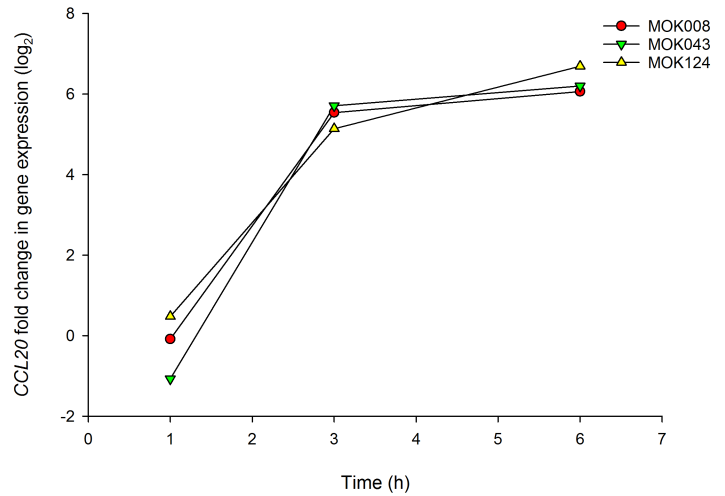

# pbMEC

## CC71

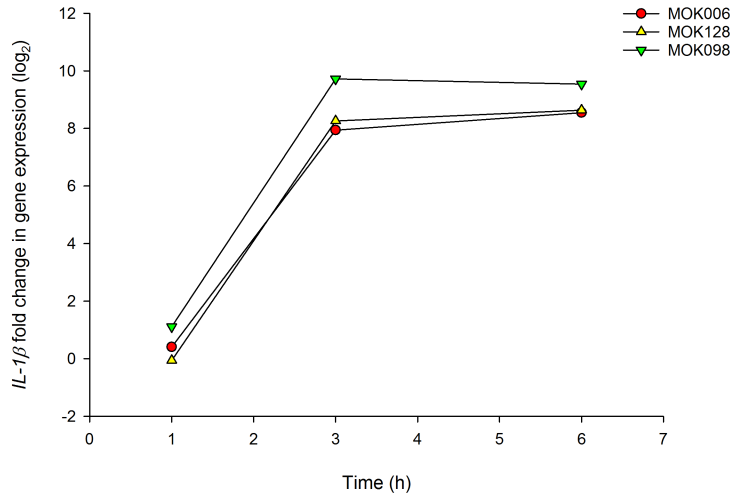

## CC97

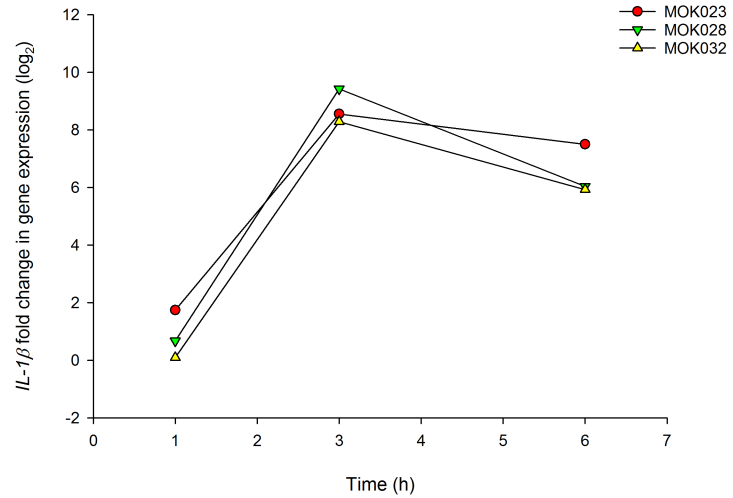

## ST136

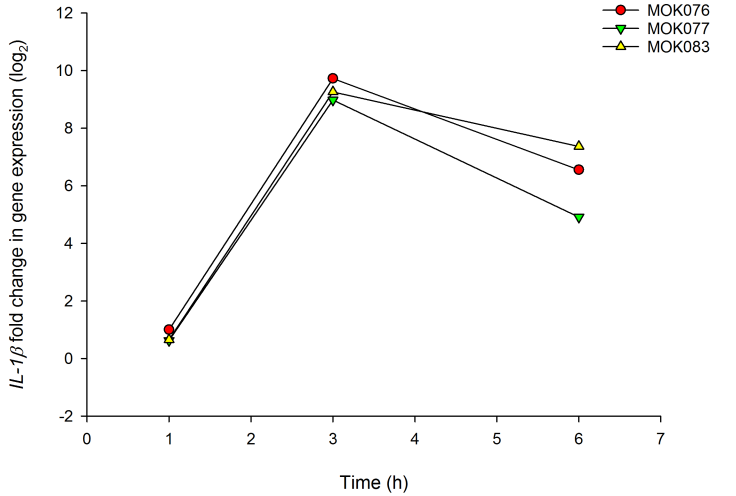

## CC151

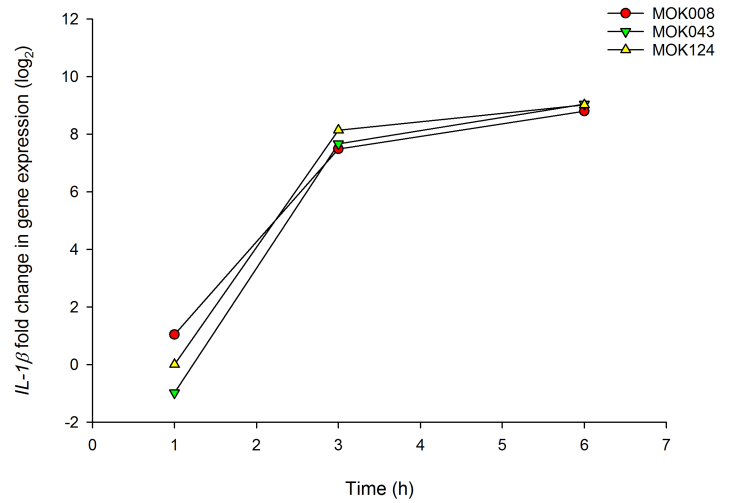

# pbMEC

## CC71

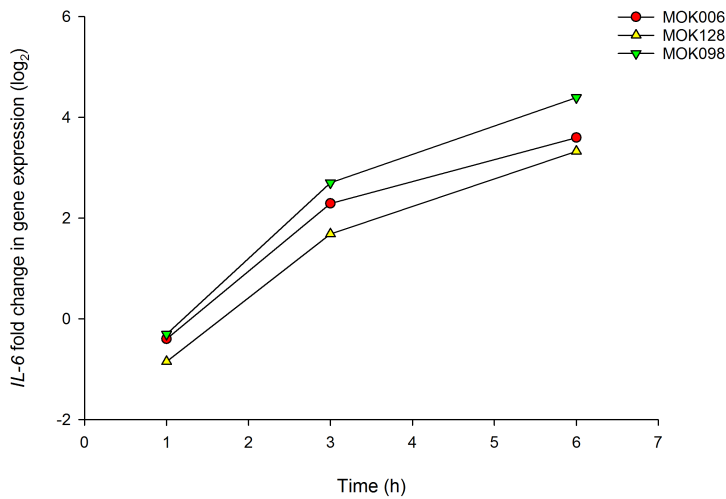

## CC97

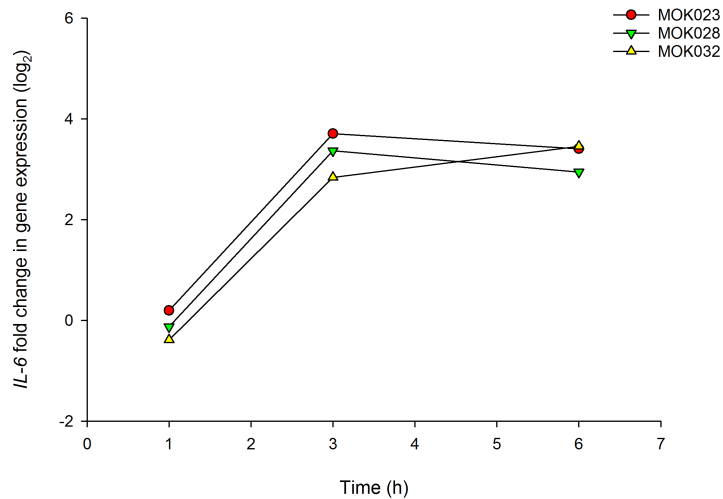

## ST136

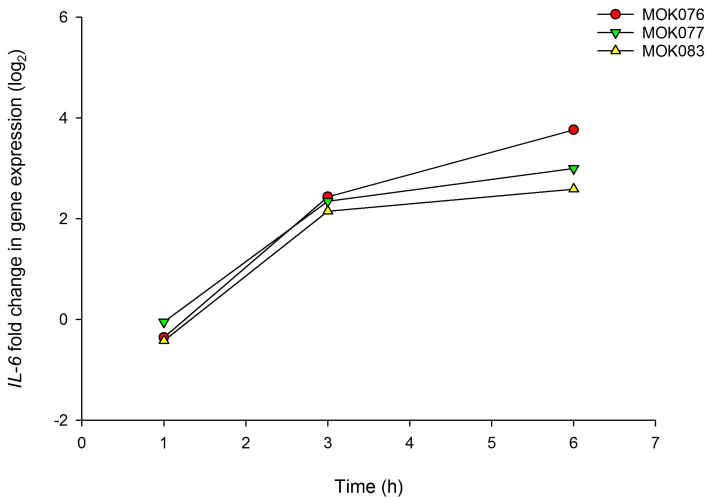

## CC151

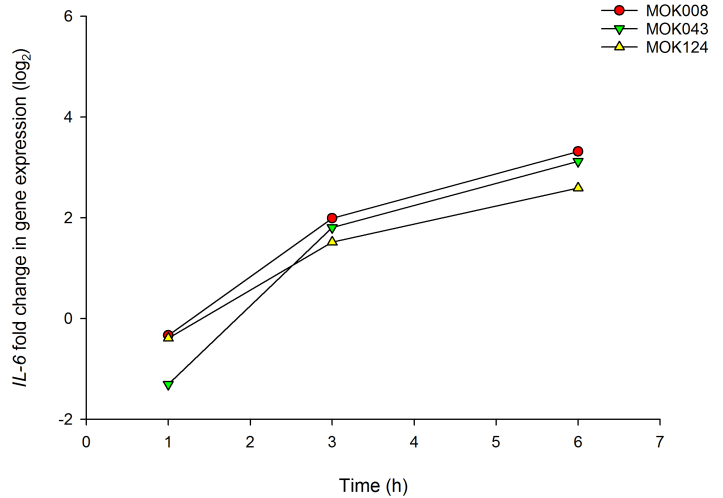

# pbMEC

## CC71

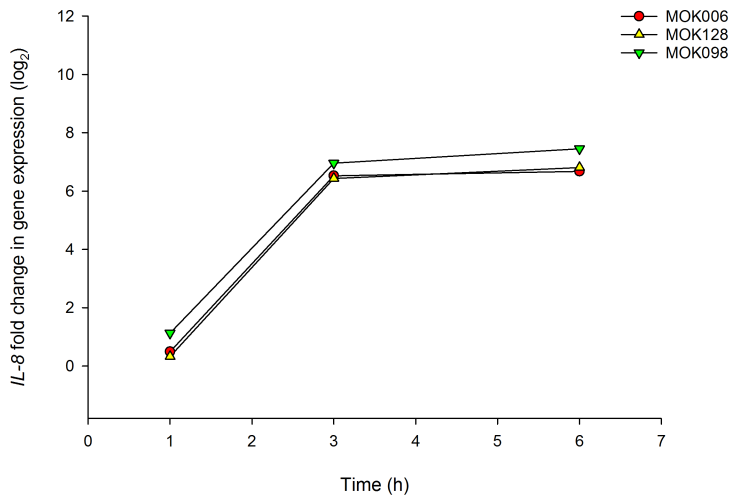

## CC97

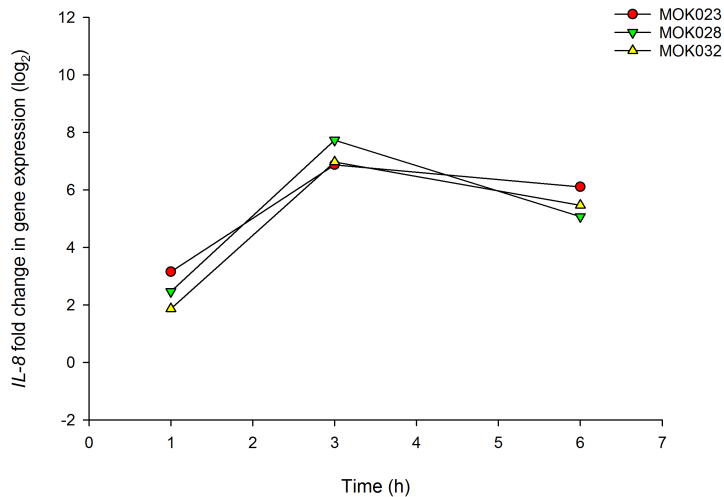

## ST136

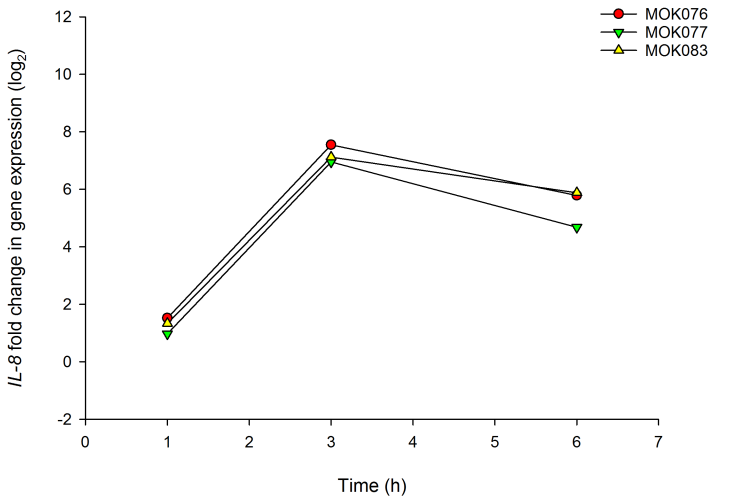

## CC151

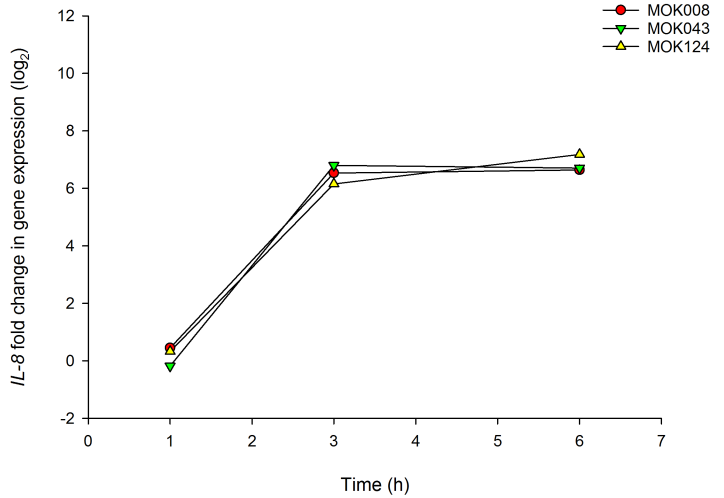

# pbMEC

## CC71

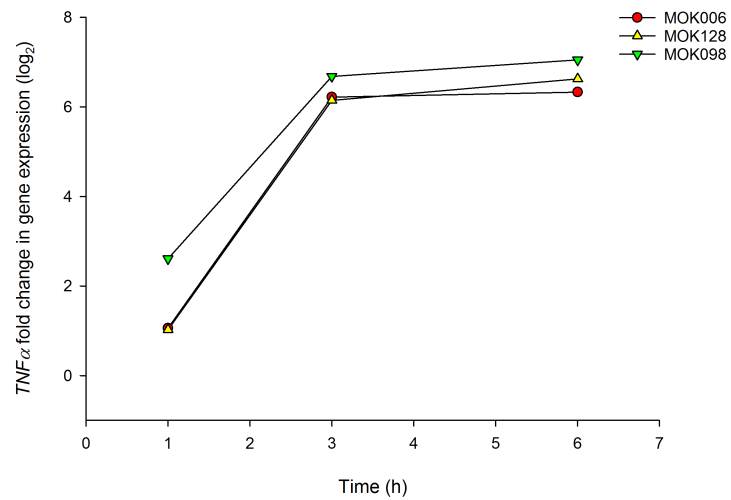

## CC97

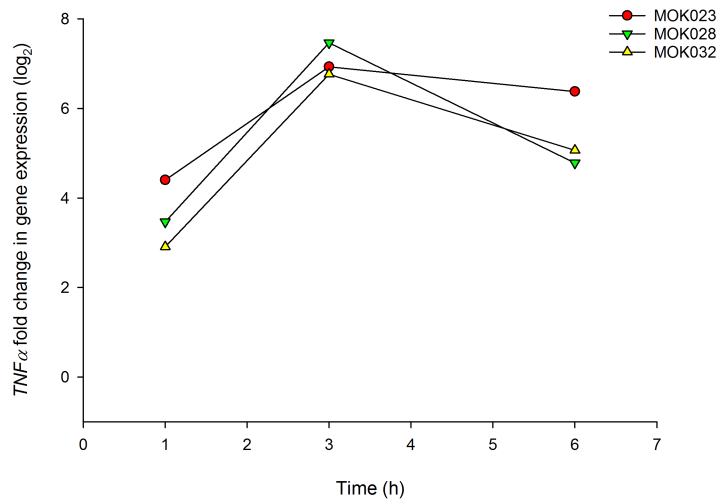

## ST136

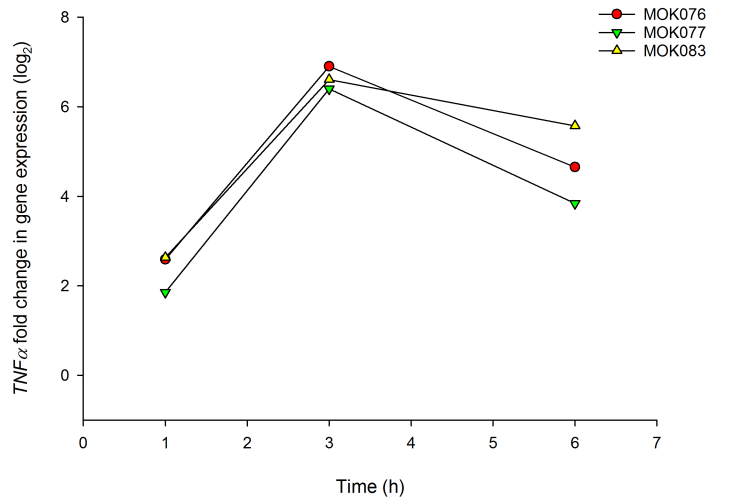

## CC151

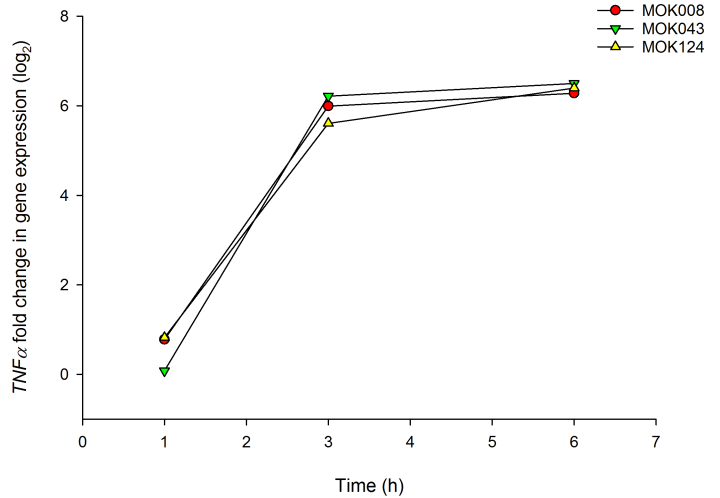

# pbMEC

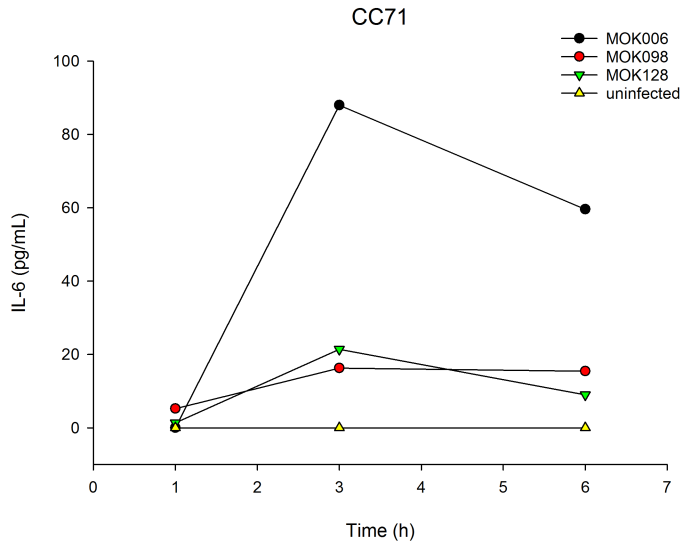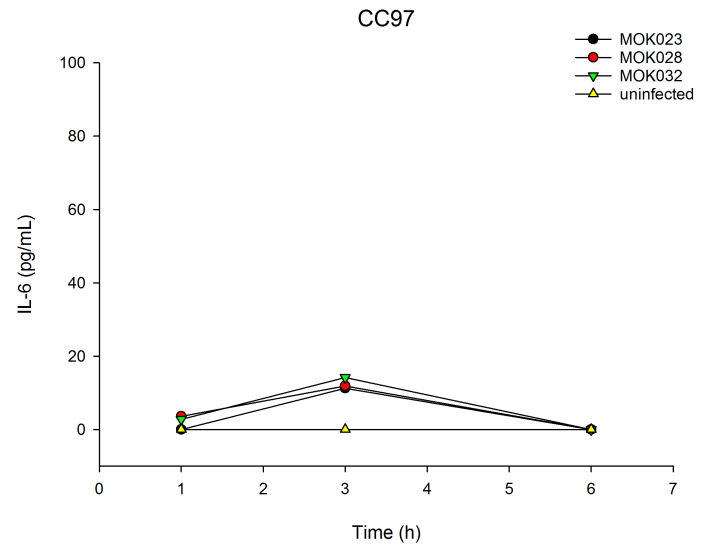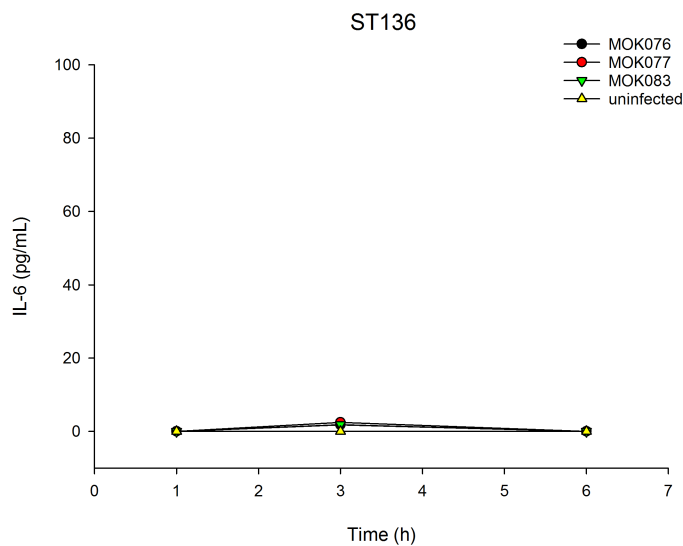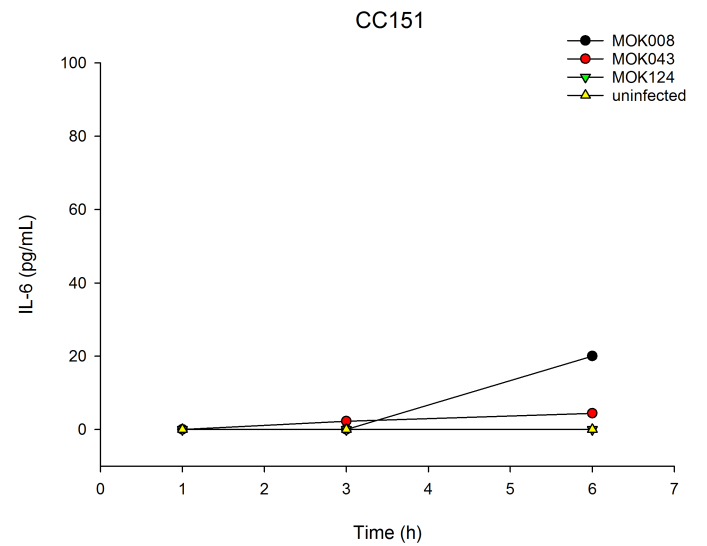

# pbMEC

## CC71

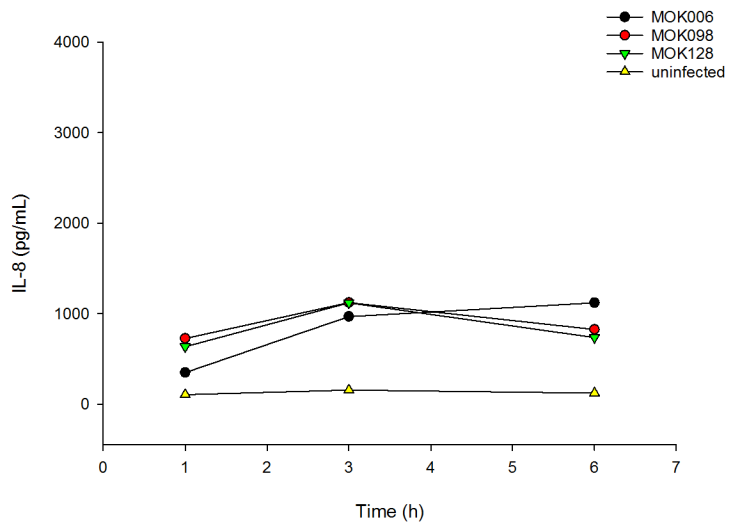

## CC97

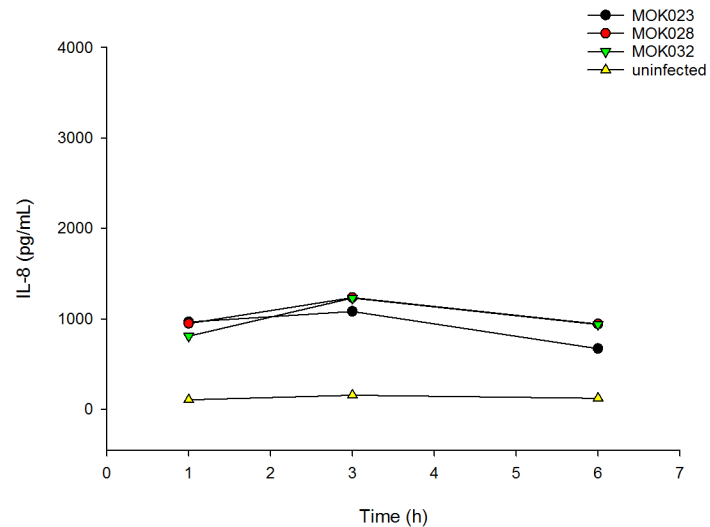

## ST136

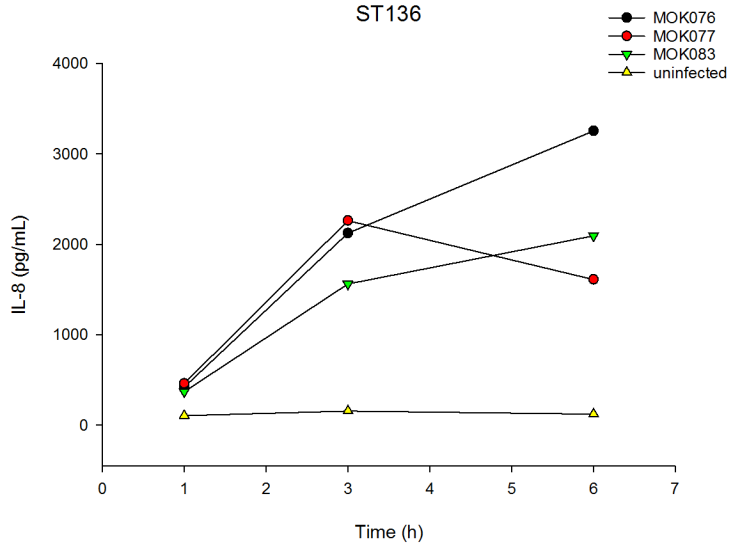

## CC151

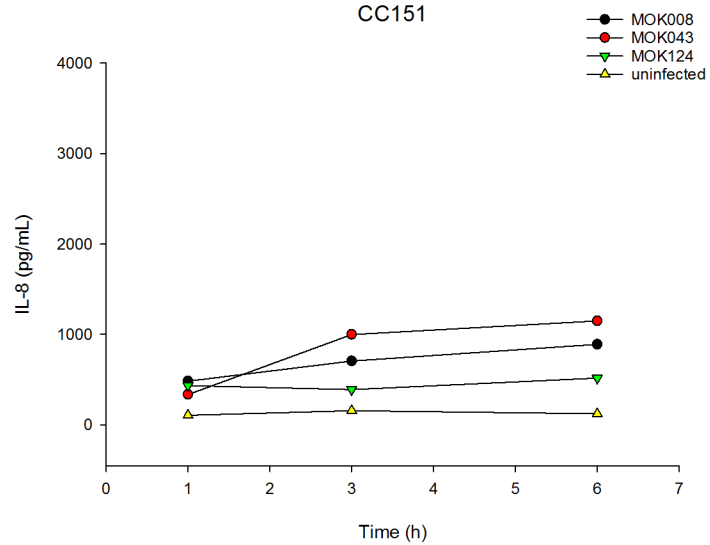

Significant differences in *CCL20* gene expression in MAC-T infected with *S. aureus*

| Time | Strain | Strain | Gene         | Adj P  |
|------|--------|--------|--------------|--------|
| 3    | MOK006 | MOK023 | <i>CCL20</i> | <.0001 |
| 3    | MOK006 | MOK028 | <i>CCL20</i> | <.0001 |
| 3    | MOK006 | MOK032 | <i>CCL20</i> | <.0001 |
| 3    | MOK006 | MOK098 | <i>CCL20</i> | 0.0205 |
| 3    | MOK008 | MOK023 | <i>CCL20</i> | <.0001 |
| 3    | MOK008 | MOK028 | <i>CCL20</i> | <.0001 |
| 3    | MOK008 | MOK032 | <i>CCL20</i> | <.0001 |
| 3    | MOK008 | MOK076 | <i>CCL20</i> | 0.0488 |
| 3    | MOK008 | MOK077 | <i>CCL20</i> | 0.0485 |
| 3    | MOK008 | MOK098 | <i>CCL20</i> | <.0001 |
| 3    | MOK008 | MOK128 | <i>CCL20</i> | 0.0009 |
| 3    | MOK023 | MOK043 | <i>CCL20</i> | <.0001 |
| 3    | MOK023 | MOK076 | <i>CCL20</i> | <.0001 |
| 3    | MOK023 | MOK077 | <i>CCL20</i> | <.0001 |
| 3    | MOK023 | MOK083 | <i>CCL20</i> | <.0001 |
| 3    | MOK023 | MOK098 | <i>CCL20</i> | 0.0042 |
| 3    | MOK023 | MOK124 | <i>CCL20</i> | <.0001 |
| 3    | MOK023 | MOK128 | <i>CCL20</i> | <.0001 |
| 3    | MOK028 | MOK043 | <i>CCL20</i> | <.0001 |
| 3    | MOK028 | MOK076 | <i>CCL20</i> | <.0001 |
| 3    | MOK028 | MOK077 | <i>CCL20</i> | <.0001 |
| 3    | MOK028 | MOK083 | <i>CCL20</i> | <.0001 |
| 3    | MOK028 | MOK098 | <i>CCL20</i> | 0.0018 |
| 3    | MOK028 | MOK124 | <i>CCL20</i> | <.0001 |
| 3    | MOK028 | MOK128 | <i>CCL20</i> | <.0001 |
| 3    | MOK032 | MOK043 | <i>CCL20</i> | <.0001 |
| 3    | MOK032 | MOK076 | <i>CCL20</i> | <.0001 |
| 3    | MOK032 | MOK077 | <i>CCL20</i> | <.0001 |
| 3    | MOK032 | MOK083 | <i>CCL20</i> | <.0001 |
| 3    | MOK032 | MOK098 | <i>CCL20</i> | 0.0288 |
| 3    | MOK032 | MOK124 | <i>CCL20</i> | <.0001 |
| 3    | MOK032 | MOK128 | <i>CCL20</i> | <.0001 |
| 3    | MOK043 | MOK098 | <i>CCL20</i> | <.0001 |
| 3    | MOK076 | MOK098 | <i>CCL20</i> | 0.0235 |
| 3    | MOK077 | MOK098 | <i>CCL20</i> | 0.0237 |
| 3    | MOK083 | MOK098 | <i>CCL20</i> | 0.0156 |
| 3    | MOK098 | MOK124 | <i>CCL20</i> | <.0001 |
| 3    | MOK124 | MOK128 | <i>CCL20</i> | 0.0025 |
| 6    | MOK006 | MOK023 | <i>CCL20</i> | <.0001 |
| 6    | MOK006 | MOK028 | <i>CCL20</i> | <.0001 |
| 6    | MOK006 | MOK032 | <i>CCL20</i> | <.0001 |
| 6    | MOK006 | MOK098 | <i>CCL20</i> | <.0001 |
| 6    | MOK008 | MOK023 | <i>CCL20</i> | <.0001 |
| 6    | MOK008 | MOK028 | <i>CCL20</i> | <.0001 |
| 6    | MOK008 | MOK032 | <i>CCL20</i> | <.0001 |
| 6    | MOK008 | MOK077 | <i>CCL20</i> | 0.0195 |
| 6    | MOK008 | MOK098 | <i>CCL20</i> | <.0001 |
| 6    | MOK023 | MOK043 | <i>CCL20</i> | <.0001 |



|    |        |        |       |        |
|----|--------|--------|-------|--------|
| 6  | MOK023 | MOK076 | CCL20 | <.0001 |
| 6  | MOK023 | MOK077 | CCL20 | <.0001 |
| 6  | MOK023 | MOK083 | CCL20 | <.0001 |
| 6  | MOK023 | MOK124 | CCL20 | <.0001 |
| 6  | MOK023 | MOK128 | CCL20 | <.0001 |
| 6  | MOK028 | MOK043 | CCL20 | <.0001 |
| 6  | MOK028 | MOK076 | CCL20 | <.0001 |
| 6  | MOK028 | MOK077 | CCL20 | <.0001 |
| 6  | MOK028 | MOK083 | CCL20 | <.0001 |
| 6  | MOK028 | MOK124 | CCL20 | <.0001 |
| 6  | MOK028 | MOK128 | CCL20 | <.0001 |
| 6  | MOK032 | MOK043 | CCL20 | <.0001 |
| 6  | MOK032 | MOK076 | CCL20 | <.0001 |
| 6  | MOK032 | MOK077 | CCL20 | <.0001 |
| 6  | MOK032 | MOK083 | CCL20 | <.0001 |
| 6  | MOK032 | MOK124 | CCL20 | <.0001 |
| 6  | MOK032 | MOK128 | CCL20 | <.0001 |
| 6  | MOK043 | MOK098 | CCL20 | <.0001 |
| 6  | MOK076 | MOK098 | CCL20 | 0.0002 |
| 6  | MOK077 | MOK098 | CCL20 | 0.0009 |
| 6  | MOK077 | MOK124 | CCL20 | 0.0275 |
| 6  | MOK083 | MOK098 | CCL20 | <.0001 |
| 6  | MOK098 | MOK124 | CCL20 | <.0001 |
| 6  | MOK098 | MOK128 | CCL20 | <.0001 |
| 12 | MOK006 | MOK023 | CCL20 | 0.0387 |
| 12 | MOK006 | MOK028 | CCL20 | 0.0013 |
| 12 | MOK006 | MOK032 | CCL20 | 0.0205 |
| 12 | MOK006 | MOK098 | CCL20 | 0.0053 |
| 12 | MOK023 | MOK076 | CCL20 | 0.0332 |
| 12 | MOK023 | MOK077 | CCL20 | 0.0157 |
| 12 | MOK023 | MOK083 | CCL20 | 0.0212 |
| 12 | MOK023 | MOK128 | CCL20 | 0.0007 |
| 12 | MOK028 | MOK043 | CCL20 | 0.0018 |
| 12 | MOK028 | MOK076 | CCL20 | 0.0011 |
| 12 | MOK028 | MOK077 | CCL20 | 0.0004 |
| 12 | MOK028 | MOK083 | CCL20 | 0.0006 |
| 12 | MOK028 | MOK124 | CCL20 | 0.0027 |
| 12 | MOK028 | MOK128 | CCL20 | <.0001 |
| 12 | MOK032 | MOK043 | CCL20 | 0.028  |
| 12 | MOK032 | MOK076 | CCL20 | 0.0174 |
| 12 | MOK032 | MOK077 | CCL20 | 0.008  |
| 12 | MOK032 | MOK083 | CCL20 | 0.0109 |
| 12 | MOK032 | MOK124 | CCL20 | 0.0396 |
| 12 | MOK032 | MOK128 | CCL20 | 0.0003 |
| 12 | MOK043 | MOK098 | CCL20 | 0.0075 |
| 12 | MOK076 | MOK098 | CCL20 | 0.0045 |
| 12 | MOK077 | MOK098 | CCL20 | 0.002  |
| 12 | MOK083 | MOK098 | CCL20 | 0.0027 |
| 12 | MOK098 | MOK124 | CCL20 | 0.0109 |
| 12 | MOK098 | MOK128 | CCL20 | <.0001 |

|    |        |        |       |        |
|----|--------|--------|-------|--------|
| 24 | MOK006 | MOK043 | CCL20 | 0.0118 |
| 24 | MOK006 | MOK076 | CCL20 | 0.011  |
| 24 | MOK006 | MOK077 | CCL20 | 0.0001 |
| 24 | MOK006 | MOK083 | CCL20 | 0.002  |
| 24 | MOK006 | MOK124 | CCL20 | 0.0321 |
| 24 | MOK006 | MOK128 | CCL20 | 0.0005 |
| 24 | MOK008 | MOK023 | CCL20 | <.0001 |
| 24 | MOK008 | MOK028 | CCL20 | 0.0003 |
| 24 | MOK008 | MOK098 | CCL20 | <.0001 |
| 24 | MOK023 | MOK043 | CCL20 | <.0001 |
| 24 | MOK023 | MOK076 | CCL20 | <.0001 |
| 24 | MOK023 | MOK077 | CCL20 | <.0001 |
| 24 | MOK023 | MOK083 | CCL20 | <.0001 |
| 24 | MOK023 | MOK124 | CCL20 | <.0001 |
| 24 | MOK023 | MOK128 | CCL20 | <.0001 |
| 24 | MOK028 | MOK043 | CCL20 | <.0001 |
| 24 | MOK028 | MOK076 | CCL20 | <.0001 |
| 24 | MOK028 | MOK077 | CCL20 | <.0001 |
| 24 | MOK028 | MOK083 | CCL20 | <.0001 |
| 24 | MOK028 | MOK124 | CCL20 | 0.0002 |
| 24 | MOK028 | MOK128 | CCL20 | <.0001 |
| 24 | MOK032 | MOK043 | CCL20 | 0.0202 |
| 24 | MOK032 | MOK076 | CCL20 | 0.0188 |
| 24 | MOK032 | MOK077 | CCL20 | 0.0002 |
| 24 | MOK032 | MOK083 | CCL20 | 0.0037 |
| 24 | MOK032 | MOK128 | CCL20 | 0.0009 |
| 24 | MOK043 | MOK098 | CCL20 | <.0001 |
| 24 | MOK076 | MOK098 | CCL20 | <.0001 |
| 24 | MOK077 | MOK098 | CCL20 | <.0001 |
| 24 | MOK083 | MOK098 | CCL20 | <.0001 |
| 24 | MOK098 | MOK124 | CCL20 | <.0001 |
| 24 | MOK098 | MOK128 | CCL20 | <.0001 |

Significant differences in *IL1 $\beta$*  gene expression in MAC-T infected with *S. aureus*

| Time | Strain | Strain | Gene        | Adj P  |
|------|--------|--------|-------------|--------|
| 3    | MOK006 | MOK023 | <i>IL1B</i> | 0.0004 |
| 3    | MOK006 | MOK028 | <i>IL1B</i> | 0.0001 |
| 3    | MOK006 | MOK032 | <i>IL1B</i> | 0.0039 |
| 3    | MOK008 | MOK023 | <i>IL1B</i> | <.0001 |
| 3    | MOK008 | MOK028 | <i>IL1B</i> | <.0001 |
| 3    | MOK008 | MOK032 | <i>IL1B</i> | 0.0009 |
| 3    | MOK023 | MOK043 | <i>IL1B</i> | 0.0006 |
| 3    | MOK023 | MOK076 | <i>IL1B</i> | 0.0006 |
| 3    | MOK023 | MOK077 | <i>IL1B</i> | 0.0003 |
| 3    | MOK023 | MOK083 | <i>IL1B</i> | 0.0021 |
| 3    | MOK023 | MOK098 | <i>IL1B</i> | 0.0013 |
| 3    | MOK023 | MOK124 | <i>IL1B</i> | 0.0002 |
| 3    | MOK023 | MOK128 | <i>IL1B</i> | 0.0003 |
| 3    | MOK028 | MOK043 | <i>IL1B</i> | 0.0002 |
| 3    | MOK028 | MOK076 | <i>IL1B</i> | 0.0002 |
| 3    | MOK028 | MOK077 | <i>IL1B</i> | 0.0001 |
| 3    | MOK028 | MOK083 | <i>IL1B</i> | 0.0008 |
| 3    | MOK028 | MOK098 | <i>IL1B</i> | 0.0005 |
| 3    | MOK028 | MOK124 | <i>IL1B</i> | <.0001 |
| 3    | MOK028 | MOK128 | <i>IL1B</i> | 0.0001 |
| 3    | MOK032 | MOK043 | <i>IL1B</i> | 0.0058 |
| 3    | MOK032 | MOK076 | <i>IL1B</i> | 0.0062 |
| 3    | MOK032 | MOK077 | <i>IL1B</i> | 0.0031 |
| 3    | MOK032 | MOK083 | <i>IL1B</i> | 0.0155 |
| 3    | MOK032 | MOK098 | <i>IL1B</i> | 0.0126 |
| 3    | MOK032 | MOK124 | <i>IL1B</i> | 0.0021 |
| 3    | MOK032 | MOK128 | <i>IL1B</i> | 0.0035 |
| 6    | MOK006 | MOK023 | <i>IL1B</i> | <.0001 |
| 6    | MOK006 | MOK028 | <i>IL1B</i> | <.0001 |
| 6    | MOK006 | MOK032 | <i>IL1B</i> | 0.0003 |
| 6    | MOK008 | MOK023 | <i>IL1B</i> | <.0001 |
| 6    | MOK008 | MOK028 | <i>IL1B</i> | <.0001 |
| 6    | MOK008 | MOK032 | <i>IL1B</i> | <.0001 |
| 6    | MOK008 | MOK098 | <i>IL1B</i> | 0.0035 |
| 6    | MOK023 | MOK043 | <i>IL1B</i> | <.0001 |
| 6    | MOK023 | MOK076 | <i>IL1B</i> | <.0001 |
| 6    | MOK023 | MOK077 | <i>IL1B</i> | 0.0004 |
| 6    | MOK023 | MOK083 | <i>IL1B</i> | 0.0002 |
| 6    | MOK023 | MOK124 | <i>IL1B</i> | <.0001 |
| 6    | MOK023 | MOK128 | <i>IL1B</i> | 0.0002 |
| 6    | MOK028 | MOK043 | <i>IL1B</i> | <.0001 |
| 6    | MOK028 | MOK076 | <i>IL1B</i> | <.0001 |
| 6    | MOK028 | MOK077 | <i>IL1B</i> | <.0001 |
| 6    | MOK028 | MOK083 | <i>IL1B</i> | <.0001 |
| 6    | MOK028 | MOK098 | <i>IL1B</i> | 0.0308 |
| 6    | MOK028 | MOK124 | <i>IL1B</i> | <.0001 |
| 6    | MOK028 | MOK128 | <i>IL1B</i> | <.0001 |
| 6    | MOK032 | MOK043 | <i>IL1B</i> | <.0001 |

|   |        |        |             |        |
|---|--------|--------|-------------|--------|
| 6 | MOK032 | MOK076 | <i>IL1B</i> | 0.0006 |
| 6 | MOK032 | MOK077 | <i>IL1B</i> | 0.0022 |
| 6 | MOK032 | MOK083 | <i>IL1B</i> | 0.0015 |
| 6 | MOK032 | MOK124 | <i>IL1B</i> | <.0001 |
| 6 | MOK032 | MOK128 | <i>IL1B</i> | 0.0012 |
| 6 | MOK043 | MOK098 | <i>IL1B</i> | 0.0056 |
| 6 | MOK098 | MOK124 | <i>IL1B</i> | 0.0038 |

Significant differences in *IL6* gene expression in MAC-T cells with *S. aureus*

| <b>Time</b> | <b>Strain</b> | <b>Strain</b> | <b>Gene</b> | <b>Adj P</b> |
|-------------|---------------|---------------|-------------|--------------|
| 6           | MOK028        | MOK124        | <i>IL6</i>  | 0.0416       |
| 6           | MOK032        | MOK124        | <i>IL6</i>  | 0.0241       |
| 12          | MOK008        | MOK028        | <i>IL6</i>  | 0.0014       |
| 12          | MOK008        | MOK032        | <i>IL6</i>  | 0.0052       |
| 12          | MOK028        | MOK077        | <i>IL6</i>  | 0.0447       |
| 12          | MOK028        | MOK124        | <i>IL6</i>  | 0.0184       |
| 12          | MOK028        | MOK128        | <i>IL6</i>  | 0.0183       |
| 24          | MOK043        | MOK098        | <i>IL6</i>  | 0.047        |

Significant differences in *IL8* gene expression in MAC-T infected with *S. aureus*

| Time | Strain | Strain | Gene       | Adj P  |
|------|--------|--------|------------|--------|
| 3    | MOK006 | MOK023 | <i>IL8</i> | <.0001 |
| 3    | MOK006 | MOK028 | <i>IL8</i> | <.0001 |
| 3    | MOK006 | MOK032 | <i>IL8</i> | 0.0046 |
| 3    | MOK008 | MOK023 | <i>IL8</i> | <.0001 |
| 3    | MOK008 | MOK028 | <i>IL8</i> | <.0001 |
| 3    | MOK008 | MOK032 | <i>IL8</i> | 0.0038 |
| 3    | MOK023 | MOK043 | <i>IL8</i> | <.0001 |
| 3    | MOK023 | MOK076 | <i>IL8</i> | 0.0002 |
| 3    | MOK023 | MOK077 | <i>IL8</i> | 0.0002 |
| 3    | MOK023 | MOK083 | <i>IL8</i> | 0.0003 |
| 3    | MOK023 | MOK124 | <i>IL8</i> | <.0001 |
| 3    | MOK023 | MOK128 | <i>IL8</i> | 0.0005 |
| 3    | MOK028 | MOK043 | <i>IL8</i> | <.0001 |
| 3    | MOK028 | MOK076 | <i>IL8</i> | 0.0001 |
| 3    | MOK028 | MOK077 | <i>IL8</i> | <.0001 |
| 3    | MOK028 | MOK083 | <i>IL8</i> | 0.0002 |
| 3    | MOK028 | MOK124 | <i>IL8</i> | <.0001 |
| 3    | MOK028 | MOK128 | <i>IL8</i> | 0.0003 |
| 3    | MOK032 | MOK043 | <i>IL8</i> | 0.0057 |
| 3    | MOK032 | MOK076 | <i>IL8</i> | 0.0178 |
| 3    | MOK032 | MOK077 | <i>IL8</i> | 0.0119 |
| 3    | MOK032 | MOK083 | <i>IL8</i> | 0.0242 |
| 3    | MOK032 | MOK124 | <i>IL8</i> | 0.0032 |
| 3    | MOK032 | MOK128 | <i>IL8</i> | 0.0348 |
| 6    | MOK006 | MOK023 | <i>IL8</i> | <.0001 |
| 6    | MOK006 | MOK028 | <i>IL8</i> | <.0001 |
| 6    | MOK006 | MOK032 | <i>IL8</i> | <.0001 |
| 6    | MOK006 | MOK098 | <i>IL8</i> | 0.0001 |
| 6    | MOK008 | MOK023 | <i>IL8</i> | <.0001 |
| 6    | MOK008 | MOK028 | <i>IL8</i> | <.0001 |
| 6    | MOK008 | MOK032 | <i>IL8</i> | <.0001 |
| 6    | MOK008 | MOK098 | <i>IL8</i> | <.0001 |
| 6    | MOK023 | MOK043 | <i>IL8</i> | <.0001 |
| 6    | MOK023 | MOK076 | <i>IL8</i> | <.0001 |
| 6    | MOK023 | MOK077 | <i>IL8</i> | <.0001 |
| 6    | MOK023 | MOK083 | <i>IL8</i> | <.0001 |
| 6    | MOK023 | MOK124 | <i>IL8</i> | <.0001 |
| 6    | MOK023 | MOK128 | <i>IL8</i> | <.0001 |
| 6    | MOK028 | MOK043 | <i>IL8</i> | <.0001 |
| 6    | MOK028 | MOK076 | <i>IL8</i> | <.0001 |
| 6    | MOK028 | MOK077 | <i>IL8</i> | <.0001 |
| 6    | MOK028 | MOK083 | <i>IL8</i> | <.0001 |
| 6    | MOK028 | MOK098 | <i>IL8</i> | 0.0222 |
| 6    | MOK028 | MOK124 | <i>IL8</i> | <.0001 |
| 6    | MOK028 | MOK128 | <i>IL8</i> | <.0001 |
| 6    | MOK032 | MOK043 | <i>IL8</i> | <.0001 |
| 6    | MOK032 | MOK076 | <i>IL8</i> | <.0001 |
| 6    | MOK032 | MOK077 | <i>IL8</i> | <.0001 |

|    |        |        |            |        |
|----|--------|--------|------------|--------|
| 6  | MOK032 | MOK083 | <i>IL8</i> | <.0001 |
| 6  | MOK032 | MOK124 | <i>IL8</i> | <.0001 |
| 6  | MOK032 | MOK128 | <i>IL8</i> | <.0001 |
| 6  | MOK043 | MOK098 | <i>IL8</i> | <.0001 |
| 6  | MOK076 | MOK098 | <i>IL8</i> | 0.0136 |
| 6  | MOK077 | MOK098 | <i>IL8</i> | 0.0317 |
| 6  | MOK083 | MOK098 | <i>IL8</i> | 0.0227 |
| 6  | MOK098 | MOK124 | <i>IL8</i> | 0.0009 |
| 6  | MOK098 | MOK128 | <i>IL8</i> | 0.043  |
| 12 | MOK006 | MOK023 | <i>IL8</i> | 0.0033 |
| 12 | MOK006 | MOK028 | <i>IL8</i> | <.0001 |
| 12 | MOK006 | MOK032 | <i>IL8</i> | 0.0003 |
| 12 | MOK006 | MOK098 | <i>IL8</i> | 0.0442 |
| 12 | MOK008 | MOK023 | <i>IL8</i> | 0.0401 |
| 12 | MOK008 | MOK028 | <i>IL8</i> | <.0001 |
| 12 | MOK008 | MOK032 | <i>IL8</i> | 0.0041 |
| 12 | MOK023 | MOK043 | <i>IL8</i> | 0.0002 |
| 12 | MOK023 | MOK076 | <i>IL8</i> | 0.0118 |
| 12 | MOK023 | MOK077 | <i>IL8</i> | 0.0342 |
| 12 | MOK023 | MOK083 | <i>IL8</i> | 0.0318 |
| 12 | MOK023 | MOK124 | <i>IL8</i> | 0.0017 |
| 12 | MOK023 | MOK128 | <i>IL8</i> | <.0001 |
| 12 | MOK028 | MOK043 | <i>IL8</i> | <.0001 |
| 12 | MOK028 | MOK076 | <i>IL8</i> | <.0001 |
| 12 | MOK028 | MOK077 | <i>IL8</i> | <.0001 |
| 12 | MOK028 | MOK083 | <i>IL8</i> | <.0001 |
| 12 | MOK028 | MOK124 | <i>IL8</i> | <.0001 |
| 12 | MOK028 | MOK128 | <i>IL8</i> | <.0001 |
| 12 | MOK032 | MOK043 | <i>IL8</i> | <.0001 |
| 12 | MOK032 | MOK076 | <i>IL8</i> | 0.001  |
| 12 | MOK032 | MOK077 | <i>IL8</i> | 0.0034 |
| 12 | MOK032 | MOK083 | <i>IL8</i> | 0.0031 |
| 12 | MOK032 | MOK124 | <i>IL8</i> | 0.0001 |
| 12 | MOK032 | MOK128 | <i>IL8</i> | <.0001 |
| 12 | MOK043 | MOK098 | <i>IL8</i> | 0.0031 |
| 12 | MOK098 | MOK124 | <i>IL8</i> | 0.0243 |
| 12 | MOK098 | MOK128 | <i>IL8</i> | 0.0004 |
| 24 | MOK006 | MOK023 | <i>IL8</i> | 0.0418 |
| 24 | MOK008 | MOK023 | <i>IL8</i> | 0.0026 |
| 24 | MOK008 | MOK028 | <i>IL8</i> | 0.0032 |
| 24 | MOK008 | MOK032 | <i>IL8</i> | 0.0103 |
| 24 | MOK023 | MOK043 | <i>IL8</i> | 0.0028 |
| 24 | MOK023 | MOK076 | <i>IL8</i> | 0.0124 |
| 24 | MOK023 | MOK077 | <i>IL8</i> | 0.0237 |
| 24 | MOK023 | MOK083 | <i>IL8</i> | 0.0153 |
| 24 | MOK023 | MOK124 | <i>IL8</i> | 0.004  |
| 24 | MOK023 | MOK128 | <i>IL8</i> | 0.0008 |
| 24 | MOK028 | MOK043 | <i>IL8</i> | 0.0035 |
| 24 | MOK028 | MOK076 | <i>IL8</i> | 0.0151 |
| 24 | MOK028 | MOK077 | <i>IL8</i> | 0.0286 |

|    |        |        |            |        |
|----|--------|--------|------------|--------|
| 24 | MOK028 | MOK083 | <i>IL8</i> | 0.0185 |
| 24 | MOK028 | MOK124 | <i>IL8</i> | 0.0049 |
| 24 | MOK028 | MOK128 | <i>IL8</i> | 0.001  |
| 24 | MOK032 | MOK043 | <i>IL8</i> | 0.0111 |
| 24 | MOK032 | MOK076 | <i>IL8</i> | 0.0438 |
| 24 | MOK032 | MOK124 | <i>IL8</i> | 0.0153 |
| 24 | MOK032 | MOK128 | <i>IL8</i> | 0.0032 |
| 24 | MOK098 | MOK128 | <i>IL8</i> | 0.0211 |



Significant differences in *TNF*  $\alpha$  gene expression in MAC-T infected with *S. aureus*

| <b>Time</b> | <b>Strain</b> | <b>Strain</b> | <b>Gene</b> | <b>Adj P</b> |
|-------------|---------------|---------------|-------------|--------------|
| 3           | MOK006        | MOK023        | <i>TNF</i>  | 0.0276       |
| 3           | MOK006        | MOK028        | <i>TNF</i>  | 0.0114       |
| 3           | MOK008        | MOK023        | <i>TNF</i>  | 0.0012       |
| 3           | MOK008        | MOK028        | <i>TNF</i>  | 0.0004       |
| 3           | MOK023        | MOK043        | <i>TNF</i>  | 0.0025       |
| 3           | MOK023        | MOK076        | <i>TNF</i>  | 0.0136       |
| 3           | MOK023        | MOK083        | <i>TNF</i>  | 0.023        |
| 3           | MOK023        | MOK124        | <i>TNF</i>  | 0.0012       |
| 3           | MOK023        | MOK128        | <i>TNF</i>  | 0.045        |
| 3           | MOK028        | MOK043        | <i>TNF</i>  | 0.0009       |
| 3           | MOK028        | MOK076        | <i>TNF</i>  | 0.0054       |
| 3           | MOK028        | MOK077        | <i>TNF</i>  | 0.0216       |
| 3           | MOK028        | MOK083        | <i>TNF</i>  | 0.0094       |
| 3           | MOK028        | MOK124        | <i>TNF</i>  | 0.0005       |
| 3           | MOK028        | MOK128        | <i>TNF</i>  | 0.0192       |
| 6           | MOK006        | MOK023        | <i>TNF</i>  | 0.031        |
| 6           | MOK006        | MOK028        | <i>TNF</i>  | 0.0038       |
| 6           | MOK006        | MOK032        | <i>TNF</i>  | 0.0386       |
| 6           | MOK008        | MOK023        | <i>TNF</i>  | 0.0032       |
| 6           | MOK008        | MOK028        | <i>TNF</i>  | 0.0003       |
| 6           | MOK008        | MOK032        | <i>TNF</i>  | 0.0041       |
| 6           | MOK023        | MOK043        | <i>TNF</i>  | 0.0216       |
| 6           | MOK023        | MOK076        | <i>TNF</i>  | 0.0265       |
| 6           | MOK023        | MOK077        | <i>TNF</i>  | 0.0144       |
| 6           | MOK023        | MOK083        | <i>TNF</i>  | 0.0098       |
| 6           | MOK023        | MOK124        | <i>TNF</i>  | 0.0046       |
| 6           | MOK023        | MOK128        | <i>TNF</i>  | 0.0343       |
| 6           | MOK028        | MOK043        | <i>TNF</i>  | 0.0025       |
| 6           | MOK028        | MOK076        | <i>TNF</i>  | 0.0032       |
| 6           | MOK028        | MOK077        | <i>TNF</i>  | 0.0016       |
| 6           | MOK028        | MOK083        | <i>TNF</i>  | 0.0011       |
| 6           | MOK028        | MOK124        | <i>TNF</i>  | 0.0005       |
| 6           | MOK028        | MOK128        | <i>TNF</i>  | 0.0043       |
| 6           | MOK032        | MOK043        | <i>TNF</i>  | 0.027        |
| 6           | MOK032        | MOK076        | <i>TNF</i>  | 0.0331       |
| 6           | MOK032        | MOK077        | <i>TNF</i>  | 0.0181       |
| 6           | MOK032        | MOK083        | <i>TNF</i>  | 0.0125       |
| 6           | MOK032        | MOK124        | <i>TNF</i>  | 0.0059       |
| 6           | MOK032        | MOK128        | <i>TNF</i>  | 0.0426       |
| 24          | MOK023        | MOK076        | <i>TNF</i>  | 0.041        |
| 24          | MOK023        | MOK077        | <i>TNF</i>  | 0.0215       |
| 24          | MOK023        | MOK083        | <i>TNF</i>  | 0.046        |
| 24          | MOK028        | MOK076        | <i>TNF</i>  | 0.0177       |
| 24          | MOK028        | MOK077        | <i>TNF</i>  | 0.0089       |
| 24          | MOK028        | MOK083        | <i>TNF</i>  | 0.02         |

Significant differences in IL-6 protein expression in MAC-T infected with *S. aureus*

| <b>Time</b> | <b>Strain</b> | <b>Strain</b> | <b>Protein</b> | <b>Adj P</b> |
|-------------|---------------|---------------|----------------|--------------|
| 1           | MOK023        | MOK083        | IL-6           | 0.0218       |
| 1           | MOK023        | MOK124        | IL-6           | 0.0315       |
| 1           | MOK028        | MOK083        | IL-6           | 0.031        |
| 1           | MOK028        | MOK124        | IL-6           | 0.0447       |
| 1           | MOK032        | MOK076        | IL-6           | 0.0178       |
| 1           | MOK032        | MOK077        | IL-6           | 0.0306       |
| 1           | MOK032        | MOK083        | IL-6           | 0.0059       |
| 1           | MOK032        | MOK098        | IL-6           | 0.048        |
| 1           | MOK032        | MOK124        | IL-6           | 0.0084       |
| 1           | MOK032        | MOK128        | IL-6           | 0.0435       |
| 3           | MOK008        | MOK028        | IL-6           | 0.0457       |
| 6           | MOK008        | MOK043        | IL-6           | 0.0094       |
| 6           | MOK043        | MOK124        | IL-6           | 0.0087       |
| 12          | MOK006        | MOK023        | IL-6           | 0.0213       |
| 12          | MOK008        | MOK023        | IL-6           | 0.0012       |
| 12          | MOK023        | MOK028        | IL-6           | 0.013        |
| 12          | MOK023        | MOK032        | IL-6           | 0.03         |
| 12          | MOK023        | MOK076        | IL-6           | 0.0017       |
| 12          | MOK023        | MOK077        | IL-6           | 0.0017       |
| 12          | MOK023        | MOK083        | IL-6           | 0.0015       |
| 12          | MOK023        | MOK098        | IL-6           | 0.0051       |
| 12          | MOK023        | MOK124        | IL-6           | 0.0003       |
| 12          | MOK023        | MOK128        | IL-6           | 0.0257       |
| 12          | MOK043        | MOK124        | IL-6           | 0.0207       |

Significant differences in IL-8 protein expression in MAC-T infected with *S. aureus*

| <b>Time</b> | <b>Strain</b> | <b>Strain</b> | <b>Protein</b> | <b>Adj P</b> |
|-------------|---------------|---------------|----------------|--------------|
| 12          | MOK006        | MOK124        | IL-8           | 0.0401       |

Significant differences in *TNF $\alpha$*  gene expression in primary bMEC infected with *S. aureus*

| <b>Time</b> | <b>Strain</b> | <b>Strain</b> | <b>Gene</b>                   | <b>Adj P</b> |
|-------------|---------------|---------------|-------------------------------|--------------|
| 1           | MOK006        | MOK023        | <i>TNF<math>\alpha</math></i> | 0.0469       |
| 1           | MOK008        | MOK023        | <i>TNF<math>\alpha</math></i> | 0.0234       |
| 1           | MOK023        | MOK043        | <i>TNF<math>\alpha</math></i> | 0.0017       |
| 1           | MOK023        | MOK124        | <i>TNF<math>\alpha</math></i> | 0.026        |
| 1           | MOK023        | MOK128        | <i>TNF<math>\alpha</math></i> | 0.0432       |
| 1           | MOK028        | MOK043        | <i>TNF<math>\alpha</math></i> | 0.0112       |

Significant differences in IL-6 protein expression in primary bMEC infected with *S. aureus*

| <b>Time</b> | <b>Strain</b> | <b>Strain</b> | <b>Protein</b> | <b>Adj P</b> |
|-------------|---------------|---------------|----------------|--------------|
| 3           | MOK006        | MOK128        | IL-6           | 0.0041       |
| 3           | MOK008        | MOK023        | IL-6           | 0.0137       |
| 3           | MOK008        | MOK028        | IL-6           | 0.007        |
| 3           | MOK008        | MOK032        | IL-6           | 0.0007       |
| 3           | MOK008        | MOK098        | IL-6           | 0.0001       |
| 3           | MOK008        | MOK128        | IL-6           | <.0001       |
| 3           | MOK023        | MOK124        | IL-6           | 0.0149       |
| 3           | MOK023        | MOK128        | IL-6           | 0.0373       |
| 3           | MOK028        | MOK076        | IL-6           | 0.0353       |
| 3           | MOK028        | MOK083        | IL-6           | 0.0379       |
| 3           | MOK028        | MOK124        | IL-6           | 0.0077       |
| 3           | MOK032        | MOK043        | IL-6           | 0.0064       |
| 3           | MOK032        | MOK076        | IL-6           | 0.0041       |
| 3           | MOK032        | MOK077        | IL-6           | 0.0078       |
| 3           | MOK032        | MOK083        | IL-6           | 0.0044       |
| 3           | MOK032        | MOK124        | IL-6           | 0.0008       |
| 3           | MOK043        | MOK098        | IL-6           | 0.0012       |
| 3           | MOK043        | MOK128        | IL-6           | <.0001       |
| 3           | MOK076        | MOK098        | IL-6           | 0.0008       |
| 3           | MOK076        | MOK128        | IL-6           | <.0001       |
| 3           | MOK077        | MOK098        | IL-6           | 0.0015       |
| 3           | MOK077        | MOK128        | IL-6           | <.0001       |
| 3           | MOK083        | MOK098        | IL-6           | 0.0008       |
| 3           | MOK083        | MOK128        | IL-6           | <.0001       |
| 3           | MOK098        | MOK124        | IL-6           | 0.0001       |
| 3           | MOK124        | MOK128        | IL-6           | <.0001       |
| 6           | MOK006        | MOK098        | IL-6           | 0.0045       |
| 6           | MOK008        | MOK098        | IL-6           | <.0001       |
| 6           | MOK023        | MOK098        | IL-6           | <.0001       |
| 6           | MOK023        | MOK128        | IL-6           | 0.0056       |
| 6           | MOK028        | MOK098        | IL-6           | <.0001       |
| 6           | MOK028        | MOK128        | IL-6           | 0.0119       |
| 6           | MOK032        | MOK098        | IL-6           | <.0001       |
| 6           | MOK032        | MOK128        | IL-6           | 0.0119       |
| 6           | MOK043        | MOK098        | IL-6           | 0.0003       |
| 6           | MOK076        | MOK098        | IL-6           | <.0001       |
| 6           | MOK076        | MOK128        | IL-6           | 0.0119       |
| 6           | MOK077        | MOK098        | IL-6           | <.0001       |
| 6           | MOK077        | MOK128        | IL-6           | 0.0119       |
| 6           | MOK083        | MOK098        | IL-6           | <.0001       |
| 6           | MOK083        | MOK128        | IL-6           | 0.0119       |
| 6           | MOK098        | MOK124        | IL-6           | <.0001       |
| 6           | MOK124        | MOK128        | IL-6           | 0.0056       |

Significant differences in IL-8 protein expression in primary bMEC infected with *S. aureus*

| <b>Time</b> | <b>Strain</b> | <b>Strain</b> | <b>Protein</b> | <b>Adj P</b> |
|-------------|---------------|---------------|----------------|--------------|
| 6           | MOK023        | MOK076        | IL-8           | 0.0379       |
| 6           | MOK076        | MOK124        | IL-8           | 0.0141       |
